# Supplementary material for: Quercetin improves gut dysbiosis in antibiotic-treated mice
Source: Royal Society of Chemistry journal article supplement (doi:10.1039/d0fo01439g), 2020-01-01
Supplement: d0fo01439g1.xlsx [file d0fo01439g1.xlsx]

## Sheet: faeces sample
feces sample quercetin and its metabolites test
standard quercetin concentration 3.125
standard	quercetin			standard Isorhamnetin
	elution time	peak area	peak height		elution time	peak area	peak height
E1-1	7.001	13513	1579	E1-1	8.349	34752	3251
E1-2	7.002	15594	1904	E1-2	8.359	41834	4993
E1-3	7.027	14360	1723	E1-3	8.342	59906	6518
E1-4	7.012	17067	6945	E1-4	8.343	58337	6418
E1-5	7.01	19297	2213	E1-5	8.343	40966	4097
E1-6	7.014	12017	1588	E1-6	8.351	44252	4385
				standard Tamarixetin
					elution time	peak area	peak height
				E1-1	8.143	5909	829
				E1-2	8.158	7165	956
				E1-3	8.172	7054	945
				E1-4	8.17	6945	994
				E1-5	8.166	8907	1132
				E1-6	8.164	5930	809
	quercetin			Isorhamnetin
sample	elution time	peak area	peak height	sample	elution time	peak area	peak height
E2-1	7.007	44751	5778	E2-1	8.332	5556	686
E2-2	6.993	37120	4319	E2-2	8.331	3809	481
E2-3	6.991	35277	4356	E2-3	8.308	5785	406
E2-4	6.998	34759	4207	E2-4	8.342	2146	298
E2-5	7.001	84696	9959	E2-5	8.328	5511	658
E2-6	6.994	64375	8255	E2-6	8.324	4546	553
	peak area ratio	quercetin concentration(ug/ml)		peak area ratio	isorhamnetin concentration(ug/ml)
E2-1	3.3117	10.3491		0.159876	0.499612
E2-2	2.3804	7.43876		0.0910503	0.284532
E2-3	2.45662	7.67692		0.096568	0.301775
E2-4	2.03662	6.36444		0.0367863	0.114957
E2-5	4.38908	13.7159		0.134526	0.420394
E2-6	5.35699	16.7406		0.10273	0.321031
	quercetin concentration(ug/ml)	isorhamnetin concentration(ug/ml)
average	10.3809	0.323717
std	4.09068	0.131065

## Sheet: serum sample
serum sample quercetin and its metabolites test
quercetin standard concentration 6.25
standard	elution time	peak area	peak height	samples	elution time	peak area	peak height
E1-1	7.007	39287	3287	E2-1	6.984	204247	22828
	8.324	36436	3918		8.289	383011	41817
E1-2	6.999	36193	4630	E2-2	6.984	152155	14013
	8.324	41379	4627		8.289	269627	29743
E1-3	7.004	25363	2028	E2-3	6.986	121361	12597
	8.33	52714	5046		8.29	232579	25384
E1-4	6.974	38507	3417	E2-4	6.98	125208	13457
	8.316	59400	5311		8.283	222533	24891
E1-5	6.964	56251	7273	E2-5	6.988	229882	24361
	8.307	48614	3648		8.291	550907	63173
E1-6	6.981	55876	4782	E2-6	6.978	144784	14332
	8.326	51123	4883		8.282	205076	23317
E1-7	6.967	39997	3710	E2-7	6.98	93835	13562
	8.31	35349	3568		8.283	259731	33622
E1-8	6.978	82695	6671	E2-8	6.974	165853	18526
	8.323	42371	4607		8.275	252648	29639
	elution time	peak area	peak height	elution time	peak area	peak height
E1-1	7.007	39287	3287	8.324	36436	3918
E1-2	6.999	36193	4630	8.324	41379	4627
E1-3	7.004	25363	2028	8.33	52714	5046
E1-4	6.974	38507	3417	8.316	59400	5311
E1-5	6.964	56251	7273	8.307	48614	3648
E1-6	6.981	55876	4782	8.326	51123	4883
E1-7	6.967	39997	3710	8.31	35349	3568
E1-8	6.978	82695	6671	8.323	42371	4607
	elution time	peak area	peak height	elution time	peak area	peak height
E2-1	6.984	204247	22828	8.289	383011	41817
E2-2	6.984	152155	14013	8.289	269627	29743
E2-3	6.986	121361	12597	8.29	232579	25384
E2-4	6.98	125208	13457	8.283	222533	24891
E2-5	6.988	229882	24361	8.291	550907	63173
E2-6	6.978	144784	14332	8.282	205076	23317
E2-7	6.98	93835	13562	8.283	259731	33622
E2-8	6.974	165853	18526	8.275	252648	29639
quercetin	peak area ratio of standard to quercetin	ug/ml	isorhamnetin	peak area ratio of standard to isorhamnetin	ug/ml
	5.19884	32.4928		10.5119	65.6993
	4.20399	26.2749		6.51603	40.7252
	4.78496	29.906		4.41209	27.5756
	3.25156	20.3223		3.74635	23.4147
	4.08672	25.542		11.3323	70.8267
	2.59117	16.1948		4.01142	25.0714
	2.34605	14.6628		7.34762	45.9226
	2.0056	12.535		5.96276	37.2672
	quercetin		isorhamnetin
average	22.2413	average	42.0628
std	7.39589	std	18.0161
