# Supplementary material for: Quercetin improves gut dysbiosis in antibiotic-treated mice
Source: Royal Society of Chemistry journal article supplement (doi:10.1039/d0fo01439g), 2020-01-01
Supplement: d0fo01439g2.pdf [file d0fo01439g2.pdf]

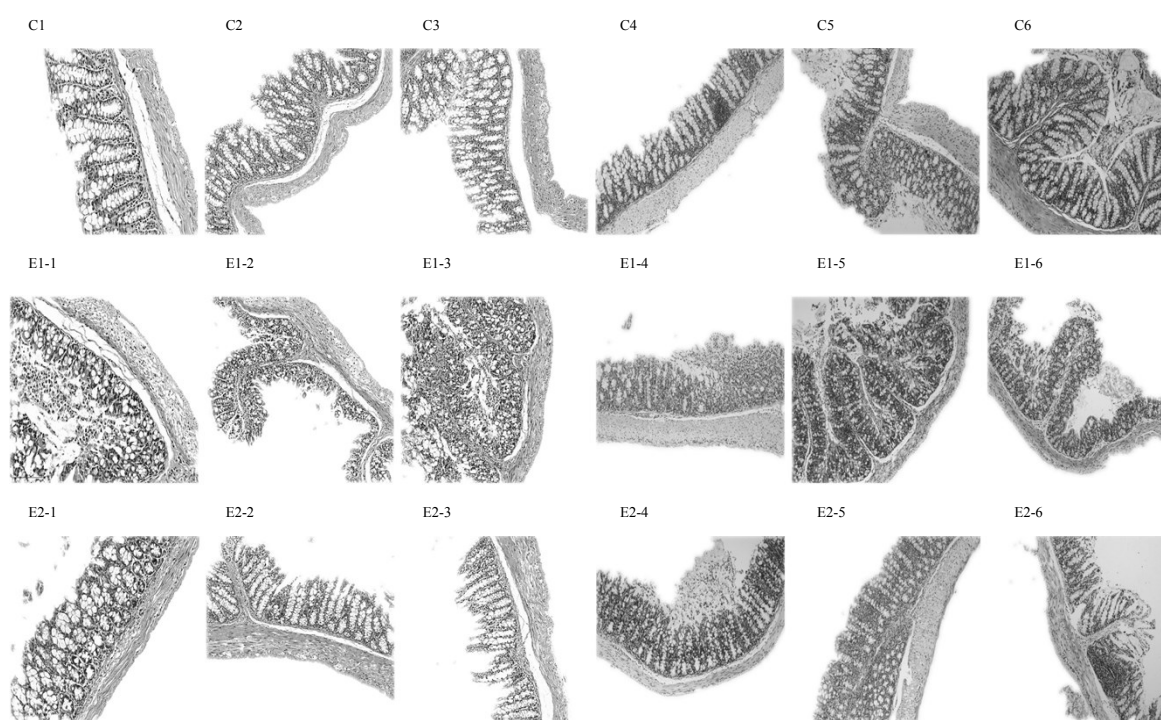

Supplementary Figure 1 Changes of histological morphology of the colonic mucosa at the end of experiment (n = 6 in each group).
